# Supplementary material for: Exploring the Mechanisms of Temporal Interference Stimulation in Enhancing Spatial Working Memory Performance through Frontoparietal Modulation
Source: Research Square preprint supplement (doi:10.21203/rs.3.rs-8187601/v1), 2025-12-15
Supplement: Supplementary file 1 [file def8bbe7354762e3ea2589cb.docx]

**Table S1: Accuracy and RT in Different Conditions**

|  | TI | | Sham | |
| --- | --- | --- | --- | --- |
| Pre-test | Post-test | Pre-test | Post-test |
| RT: Low memory load | 708±36ms | 640±27ms | 679±29ms | 628±26ms |
| RT: High memory load | 1196±69ms | 1064±60ms | 1063±56ms | 1030±60ms |
| ACC: Low memory load | 95.96±0.01 | 95.76±0.01 | 93.16±0.02 | 91.76±0.02 |
| ACC: High memory load | 68.12±0.02 | 68.52±0.02 | 66.60±0.02 | 66.40±0.02 |

**Table S2: Brain Activation In High Memory Load**

| Region | Cluster size | Peak Z value | Peak MNI coordinates |
| --- | --- | --- | --- |
| **Encoding TI:Pre-test** | | | |
| L:MOG,SPG,IPL,FFG,PoCG,IOG,PreCG,SFG,PCUN,MTG,ROL | 2507 | 6.59 | -27,-85,14 |
| R:SPG,MOG,FFG,PoCG,SOG,SFG,IOG,PreCG,IPL,ITG,LING,MFG,CAL | 2814 | 6.58 | 21,-70,56 |
| PCL,SMA,PoCG,PreCG,ORB,PCUN.L | 632 | 5.03 | -12,-25,77 |
| R:IFGOperc,PreCG | 136 | 4.74 | 54,11,32 |
| L:PUT,CAU,PAL | 79 | 4.15 | -21,-1,11 |
| R:MFG,SFG | 119 | 3.86 | 42,50,23 |
| **Encoding TI:Post-test** | | | |
| L:MOG,SPG,IPL,PoCG,PreCG,IOG,SFG,SOG,PCUN,MTG, SMA,CAL | 2775 | 6.79 | -21,-94,-1 |
| R:SPG,MOG,FFG,PoCG,SOG,SFG,IPL, IOG,PCUN,ITG,MFG,LING,MFG, IFGtriang | 2695 | 6.72 | 30,-55,53 |
| **Encoding Sham:Pre-test** | | | |
| R:SPG,MOG,FFG,SFG,SOG,PoCG,ITG, IPL,IOG,PreCG,LING,PCUN,CAL,ANG | 2483 | 6.69 | 21,-91,-7 |
| L:MOG,SPG,IPL,IOG,SFG,SOG,PCUN, PoCG,LING | 1692 | 6.42 | -24,-52,50 |
| R:PreCG,IFGOper | 114 | 5.44 | 51,8,32 |
| R:PUT,PAL,THA | 83 | 5.04 | 24,5,2 |
| L:PreCG,IFGOper | 104 | 4.98 | -48,5,32 |
| L:PUT,CAU,PAL | 112 | 4.98 | -24,5,5 |
| L:SFG,PreCG,MFG | 217 | 4.90 | -21,-4,53 |
| L:PCL,PCUN,SMA | 113 | 4.36 | -9,-31,74 |
| **Encoding Sham:Post-test** | | | |
| L:MOG,SPG,IPL,IOG,FFG,SOG,LING, CAL,PCUN,PoCG | 1539 | 6.31 | -21,-88,-13 |
| R:SPG,MOG,FFG,SOG,IOG,PoCG,LING,IPL,ITG,CAL,PCUN,SMG,ANG | 1663 | 6.21 | 18,-91,-7 |
| L:SFG,MFG,PoCG,IFGOper | 285 | 5.18 | -45,2,32 |
| R:SFG,MFG,PreCG | 209 | 4.52 | 27,-1,50 |
| **Retention TI:Pre-test** | | | |
| SFGmed.L,ORBmid,ACC | 355 | 6.00 | 0,50,-10 |
| PCUN,LING,PCG,DCG | 279 | 5.32 | -9,-52,17 |
| L:PreCG,SMA,SFG,PoCG,PCL | 377 | 5.30 | -6,-10,59 |
| L:ANG,MOG,MTG,IPL | 167 | 4.76 | -45,-73,29 |
| R:TMG,TPOmid,STG,ITG | 98 | 4.64 | 60,-4,-19 |
| **Retention TI:Post-test** | | | |
| ORBmid,SFGmed,ACG | 228 | 5.17 | 0,53,-7 |
| SMA,PCL.L,PreCG.L | 237 | 4.73 | -6,-4,59 |
| PoCG.L,SFG.L | 171 | 4.65 | -33,-13,59 |
| **Retention Sham:Pre-test** | | | |
| SMA,PreCG,PoCG,SFG,DCG,MFG | 1861 | 5.74 | -30,-25,62 |
| ORBmid,ACG,SFGmed,OLF | 280 | 5.06 | 0,56,-7 |
| L:ANG,MOG,MTG,IPL | 86 | 4.06 | -48,-73,32 |
| **Retention Sham:Post-test** | | | |
| SMA,SFG,PreCG,PoCG,DCG,PCL | 1243 | 5.95 | -15,-1,65 |
| R:PreCG,PoCG | 144 | 3.54 | 42,-25,68 |
| **Retrieval TI:Pre-test** | | | |
| PoCG,IPL,SPG,PreCG,SMA,INS.L, PCUN,ROL,MOG,SFG,DCG,SMG,SOG,PUT.L | 6172 | 6.89 | -45,-31,50 |
| R:MFG,SFG,IFGtriang | 384 | 5.75 | 45,41,29 |
| R:FFG,ITG,IOG | 451 | 5.56 | 30,-46,-25 |
| R:IFGtriang,INS,PUT,ROL | 93 | 4.94 | -30,56,14 |
| R:SFG,MFG | 174 | 4.38 | 27,8,59 |
| **Retrieval TI:Post-test** | | | |
| SMA,SFGmed,L:IPL,PreCG,INS,ROL, SMG,DCG,PUT,THA | 4922 | 7.53 | -51,-28,47 |
| R:PoCG,SPG,MOG,IPL,IFGOper,PCUN, INS,SMG,SOG,PreCG,ANG,ROL | 2827 | 7.25 | 33,-40,41 |
| R:FFG,LING,CAL,MTG | 671 | 5.39 | 54,-52,-10 |
| R:SFG,MFG | 254 | 5.06 | 27,5,53 |
| L:LING,FFG,CAL,MOG,PCUN | 196 | 4.34 | -24,-61,2 |
| **Retrieval Sham:Pre-test** | | | |
| R:SPG,MOG,IPL,PCUN,PoCG,SOG, ANG,SMG,CAL | 1772 | 7.05 | 27,-64,41 |
| L:PoCG,IPL,SPG,PreCG,INS,ROL,MOG,PCUN,SMG,PUT,SOG | 2391 | 6.03 | -42,-31,41 |
| R:FFG,ITG,LING | 229 | 5.28 | 30,-64,-10 |
| R:INS,IFGOper,ROL,PreCG,IFGtriang, PUT | 419 | 5.15 | 30,26,-1 |
| R:SFG,MFG | 146 | 4.58 | 33,8,65 |
| SFGmed,DCG | 259 | 4.58 | 3,29,41 |
| MFG.R,SFG | 125 | 4.50 | 48,38,29 |
| **Retrieval Sham:Post-test** | | | |
| R:SPG,PoCG,MOG,IPL,PCUN,SOG, SMG,ANG,CUN | 1713 | 6.87 | 39,-37,41 |
| L:PoCG,IPL,SPG,MOG,ROL,PreCG, PCUN,PUT,INS,SOG | 2338 | 6.59 | -36,-46,38 |
| R:IFGOper,PreCG,IFGtriang | 138 | 4.88 | 51,11,32 |
| SFGmed,DCG,SMA.L | 259 | 4.38 | 0,23,47 |
| FFG.R,LING.R | 187 | 4.23 | 27,-49,-13 |
| R:SFG,MFG | 111 | 4.05 | 30,11,56 |
| L:SFG,MFG | 168 | 3.91 | -24,-7,74 |


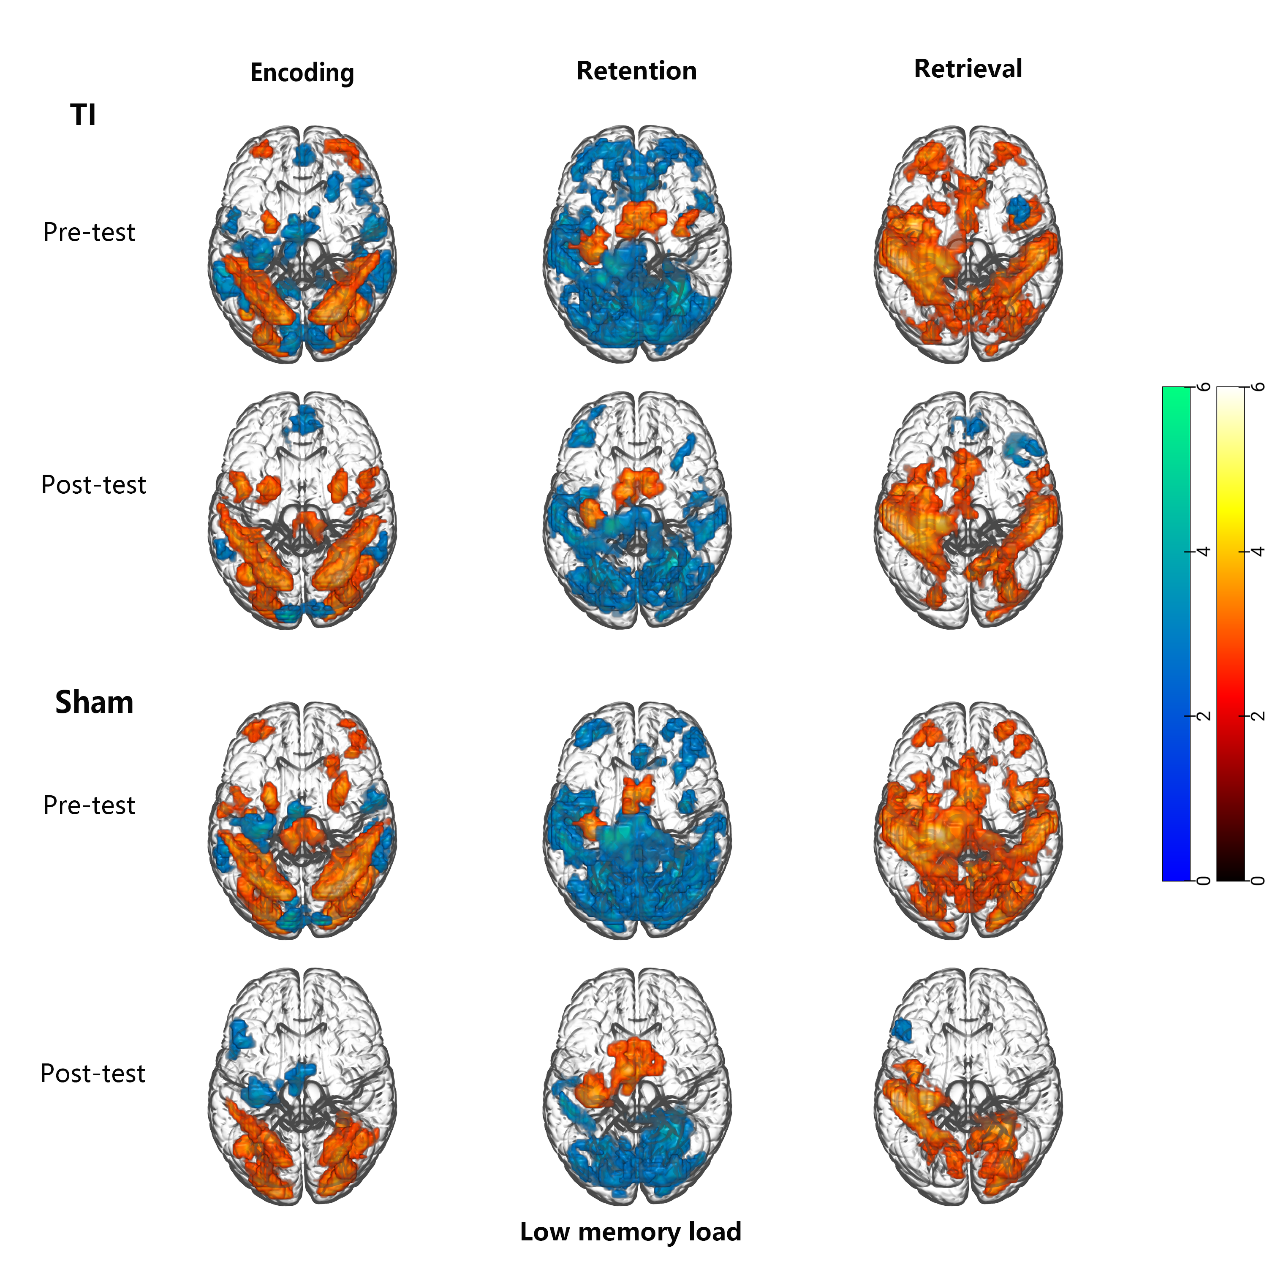


**Figure S1.** Activation patterns in low memory load tasks.


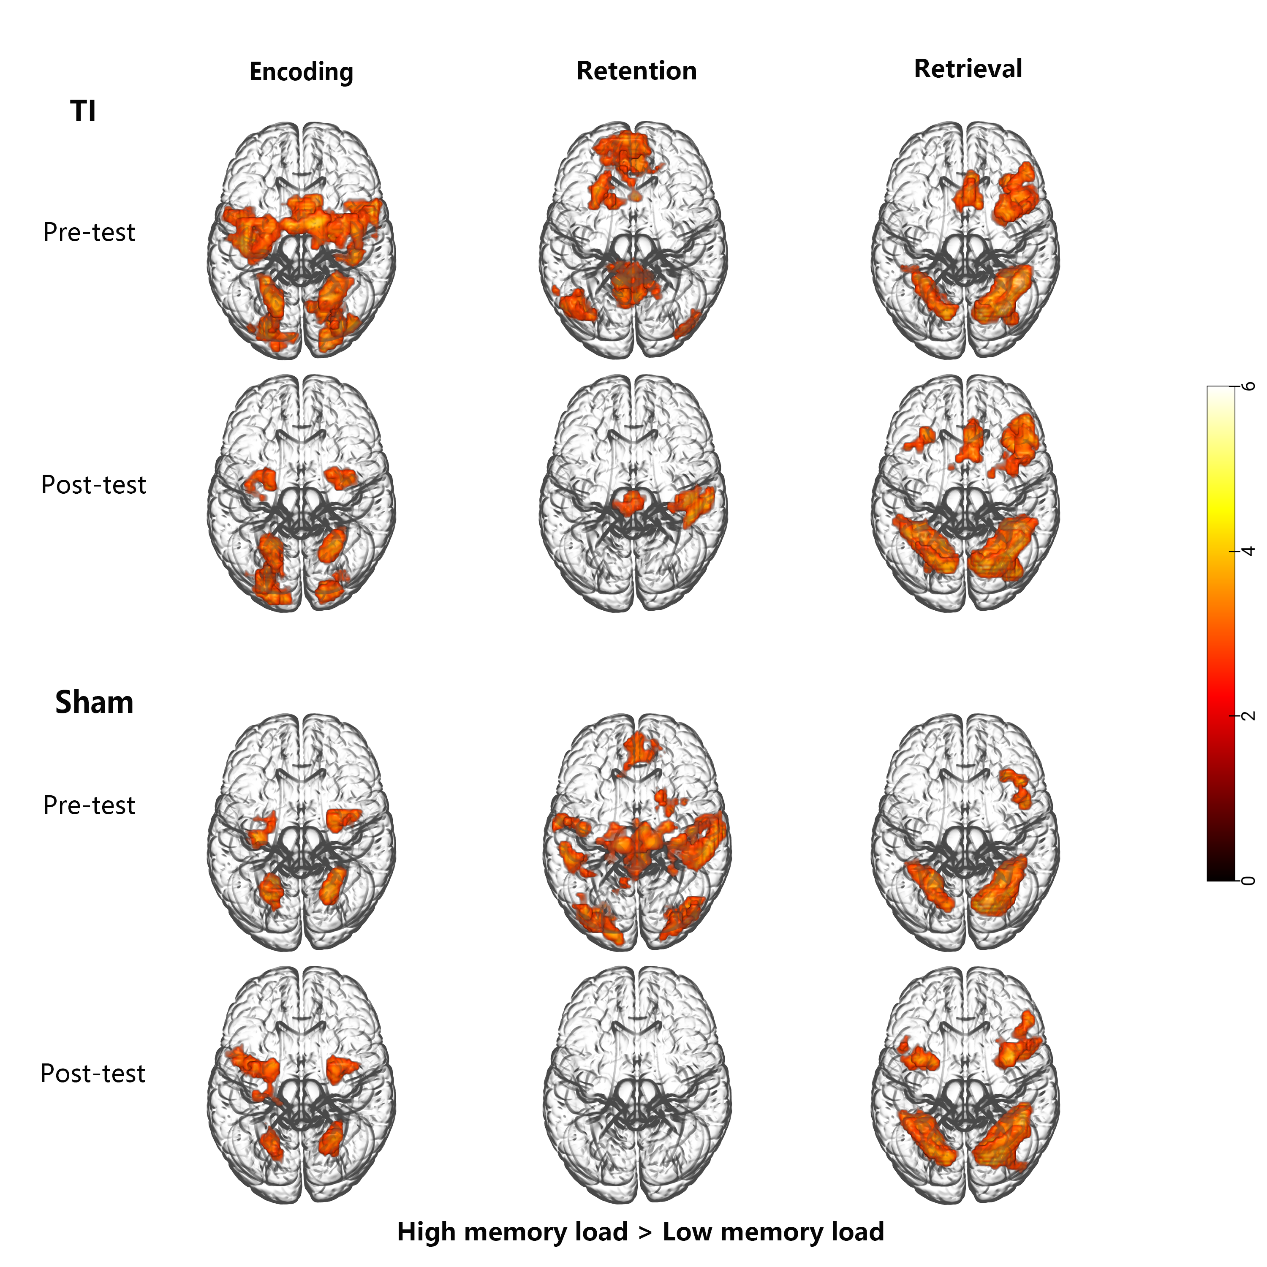


**Figure S2**. High memory load recruited greater activation in the working memory network compared to low memory load, while concurrently suppressing the DMN.
